# Supplementary material for: Agricultural Sustainability and Its Trends in India: A Macro-Level Index-Based Empirical Evaluation
Source: MDPI journal article supplement (doi:10.3390/su14052540), 2022-02-22
Supplement: s1 [file s1]

**Table S4.** Trend in per capita income, rural poverty and inequality

| State            | Per capita income (2011) | Growth in per capita income (%change) |           | Rural poverty (Head-count ratio) |           |           | Rural income inequality (Gini coefficient) |           |           |
|------------------|--------------------------|---------------------------------------|-----------|----------------------------------|-----------|-----------|--------------------------------------------|-----------|-----------|
|                  |                          | 1991-2001                             | 2001-2011 | 1993-1994                        | 2004-2005 | 2011-2012 | 1993-1994                                  | 2004-2005 | 2011-2012 |
| Andhra Pradesh   | 40057                    | 3.60                                  | 4.88      | 48.1                             | 32.3      | 10.96     | 0.285                                      | 0.235     | 0.269     |
| Assam            | 21146                    | 3.33                                  | 1.25      | 54.9                             | 36.4      | 33.89     | 0.176                                      | 0.201     | 0.220     |
| Bihar            | 15035                    | 2.28                                  | 3.08      | 63.1                             | 54.8      | 35.5      | 0.222                                      | 0.207     | 0.214     |
| Gujarat          | 53813                    | 1.14                                  | 7.61      | 43.1                             | 39.1      | 21.54     | 0.236                                      | 0.234     | 0.252     |
| Haryana          | 57797                    | 3.45                                  | 4.66      | 40                               | 24.8      | 11.64     | 0.301                                      | 0.239     | 0.278     |
| Himachal Pradesh | 46682                    | 5.86                                  | 3.61      | 36.7                             | 25        | 8.48      | 0.276                                      | 0.235     | 0.283     |
| Jammu & Kashmir  | 27666                    | 3.04                                  | 2.89      | 32.5                             | 14.1      | 11.54     | 0.234                                      | 0.173     | 0.221     |
| Karnataka        | 40699                    | 3.50                                  | 4.57      | 56.6                             | 37.5      | 24.53     | 0.266                                      | 0.241     | 0.231     |
| Kerala           | 50146                    | 4.69                                  | 5.37      | 33.9                             | 20.2      | 9.14      | 0.288                                      | 0.270     | 0.350     |
| Madhya Pradesh   | 22821                    | 0.70                                  | 3.23      | 51.0                             | 54.0      | 38.2      | 0.277                                      | 0.242     | 0.265     |
| Maharashtra      | 59587                    | 1.36                                  | 6.13      | 59.3                             | 47.9      | 24.22     | 0.302                                      | 0.258     | 0.244     |
| Odisha           | 23968                    | 2.88                                  | 4.58      | 63.0                             | 60.8      | 35.69     | 0.243                                      | 0.244     | 0.247     |
| Punjab           | 44769                    | 2.68                                  | 1.39      | 20.3                             | 22.1      | 7.66      | 0.265                                      | 0.239     | 0.285     |
| Rajasthan        | 27502                    | 2.84                                  | 3.62      | 40.8                             | 35.8      | 16.05     | 0.260                                      | 0.209     | 0.214     |
| Tamil Nadu       | 53507                    | 3.75                                  | 5.78      | 51.0                             | 37.5      | 15.83     | 0.307                                      | 0.279     | 0.257     |
| Uttar Pradesh    | 18884                    | 2.11                                  | 2.35      | 50.2                             | 42.4      | 29.6      | 0.278                                      | 0.246     | 0.428     |
| West Bengal      | 31314                    | 4.36                                  | 2.54      | 42.7                             | 24.4      | 22.52     | 0.251                                      | 0.224     | 0.220     |

Source: Data from Reserve Bank of India
