# Supplementary material for: Agricultural Sustainability and Its Trends in India: A Macro-Level Index-Based Empirical Evaluation
Source: MDPI journal article supplement (doi:10.3390/su14052540), 2022-02-22
Supplement: s1 [file s1]

**Table S5.** Trend in rural non-farm employment and work participation rate

| State            | Share of non-farm sector in rural employment |         |         | Work participation rate in rural areas |      |      |
|------------------|----------------------------------------------|---------|---------|----------------------------------------|------|------|
|                  | 1993-94                                      | 2004-05 | 2009-10 | 1991                                   | 2001 | 2011 |
| Andhra Pradesh   | 22.7                                         | 28.3    | 31.3    | 50.29                                  | 50.9 | 51.5 |
| Assam            | 21.3                                         | 25.8    | 29.5    | 36.73                                  | 46.2 | 38.7 |
| Bihar            | 18.5                                         | 23.9    | 35.7    | 33.23                                  | 36.1 | 35.9 |
| Gujarat          | 20.7                                         | 22.8    | 21.7    | 45.51                                  | 47.2 | 44.9 |
| Haryana          | 28.6                                         | 36.0    | 40.2    | 31.87                                  | 42.9 | 36.4 |
| Himachal Pradesh | 22.8                                         | 30.6    | 37.1    | 43.57                                  | 50.6 | 53.3 |
| Jammu & Kashmir  | 28.0                                         | 36.2    | 40.3    | 31.00                                  | 38.3 | 34.2 |
| Karnataka        | 18.3                                         | 19.1    | 24.3    | 46.45                                  | 49.1 | 49.4 |
| Kerala           | 42.3                                         | 58.0    | 64.3    | 32.09                                  | 32.5 | 36.3 |
| Madhya Pradesh   | 12.5                                         | 16.5    | 16.9    | 46.83                                  | 39.3 | 38.7 |
| Maharashtra      | 20.3                                         | 20.1    | 20.6    | 49.68                                  | 48.9 | 49.8 |
| Odisha           | 21.9                                         | 31.0    | 32.4    | 38.75                                  | 40.2 | 43.2 |
| Punjab           | 22.7                                         | 33.2    | 38.2    | 31.22                                  | 39.5 | 35.6 |
| Rajasthan        | 19.2                                         | 27.2    | 36.7    | 42.04                                  | 45.9 | 47.3 |
| Tamil Nadu       | 31.3                                         | 34.7    | 36.3    | 48.49                                  | 50.3 | 50.7 |
| Uttar Pradesh    | 21.4                                         | 27.1    | 32.9    | 33.46                                  | 34.2 | 33.7 |
| West Bengal      | 26.9                                         | 37.3    | 43.7    | 33.18                                  | 37.9 | 38.7 |
