# Supplementary material for: Agricultural Sustainability and Its Trends in India: A Macro-Level Index-Based Empirical Evaluation
Source: MDPI journal article supplement (doi:10.3390/su14052540), 2022-02-22
Supplement: s1 [file s1]

**Table S8.** Social sustainability index, 1991-2011

| State            | Index values |       |       | Rank |      |      | Difference of index values (2011-1991) |
|------------------|--------------|-------|-------|------|------|------|----------------------------------------|
|                  | 1991         | 2001  | 2011  | 1991 | 2001 | 2011 |                                        |
| Andhra Pradesh   | 0.384        | 0.492 | 0.613 | 10   | 11   | 5    | 0.229                                  |
| Assam            | 0.389        | 0.500 | 0.546 | 9    | 9    | 12   | 0.156                                  |
| Bihar            | 0.297        | 0.328 | 0.445 | 16   | 17   | 16   | 0.148                                  |
| Gujarat          | 0.481        | 0.514 | 0.512 | 2    | 8    | 14   | 0.030                                  |
| Haryana          | 0.348        | 0.476 | 0.536 | 12   | 12   | 13   | 0.188                                  |
| Himachal Pradesh | 0.478        | 0.659 | 0.749 | 4    | 2    | 2    | 0.271                                  |
| Jammu & Kashmir  | 0.380        | 0.561 | 0.565 | 11   | 4    | 9    | 0.186                                  |
| Karnataka        | 0.446        | 0.524 | 0.611 | 6    | 7    | 6    | 0.164                                  |
| Kerala           | 0.670        | 0.750 | 0.789 | 1    | 1    | 1    | 0.119                                  |
| Madhya Pradesh   | 0.343        | 0.373 | 0.454 | 14   | 15   | 15   | 0.111                                  |
| Maharashtra      | 0.472        | 0.555 | 0.636 | 5    | 5    | 4    | 0.164                                  |
| Odisha           | 0.345        | 0.435 | 0.554 | 13   | 13   | 11   | 0.210                                  |
| Punjab           | 0.428        | 0.496 | 0.559 | 7    | 10   | 10   | 0.131                                  |
| Rajasthan        | 0.306        | 0.432 | 0.578 | 15   | 14   | 8    | 0.272                                  |
| Tamil Nadu       | 0.478        | 0.563 | 0.709 | 3    | 3    | 3    | 0.230                                  |
| Uttar Pradesh    | 0.262        | 0.355 | 0.382 | 17   | 16   | 17   | 0.121                                  |
| West Bengal      | 0.427        | 0.553 | 0.597 | 8    | 6    | 7    | 0.171                                  |
