# Supplementary material for: Agricultural Sustainability and Its Trends in India: A Macro-Level Index-Based Empirical Evaluation
Source: MDPI journal article supplement (doi:10.3390/su14052540), 2022-02-22
Supplement: s1 [file s1]

**Table S1.** Trend in fertilizer use (NPK/ha) and fertilizer use imbalance in India, across States, 1991-2011

| State            | Fertilizer use (Kg/ha) |       |       | Index of fertilizer imbalance |       |       |
|------------------|------------------------|-------|-------|-------------------------------|-------|-------|
|                  | 1991                   | 2001  | 2011  | 1991                          | 2001  | 2011  |
| Andhra Pradesh   | 123.2                  | 159.6 | 278.4 | 0.116                         | 0.094 | 0.059 |
| Assam            | 10.3                   | 35.7  | 67.6  | 0.110                         | 0.087 | 0.125 |
| Bihar            | 56.9                   | 98.2  | 165.1 | 0.171                         | 0.188 | 0.130 |
| Gujarat          | 68.0                   | 70.1  | 174.1 | 0.079                         | 0.119 | 0.104 |
| Haryana          | 97.5                   | 147.2 | 213.8 | 0.181                         | 0.190 | 0.155 |
| Himachal Pradesh | 35.2                   | 36.7  | 59.1  | 0.175                         | 0.155 | 0.127 |
| Jammu & Kashmir  | 41.2                   | 60.1  | 105.9 | 0.136                         | 0.144 | 0.072 |
| Karnataka        | 70.5                   | 109.5 | 164   | 0.057                         | 0.064 | 0.046 |
| Kerala           | 82.5                   | 59.4  | 106.2 | 0.187                         | 0.167 | 0.154 |
| Madhya Pradesh   | 35.8                   | 36.9  | 90.5  | 0.066                         | 0.052 | 0.035 |
| Maharashtra      | 67.2                   | 74.3  | 152.8 | 0.076                         | 0.078 | 0.050 |
| Orissa           | 21.0                   | 37.9  | 59.1  | 0.130                         | 0.124 | 0.063 |
| Punjab           | 161.9                  | 161.8 | 242.7 | 0.151                         | 0.190 | 0.167 |
| Rajasthan        | 19.7                   | 31.1  | 60.6  | 0.112                         | 0.173 | 0.114 |
| Tamil Nadu       | 128.8                  | 145.3 | 220.6 | 0.140                         | 0.113 | 0.112 |
| Uttar Pradesh    | 88.7                   | 115.3 | 172.6 | 0.184                         | 0.174 | 0.133 |
| West Bengal      | 90.7                   | 116.8 | 164.9 | 0.071                         | 0.076 | 0.075 |

*Source: Estimated by the authors using data from Agricultural Statistics at a Glance, Govt of India*
