# Supplementary material for: Agricultural Sustainability and Its Trends in India: A Macro-Level Index-Based Empirical Evaluation
Source: MDPI journal article supplement (doi:10.3390/su14052540), 2022-02-22
Supplement: s1 [file s1]

**Table S6.** Environmental sustainability index, 1991-2011

| State            | Index values |       |       | Rank |      |      | Difference of index values<br>(2011-1991) |
|------------------|--------------|-------|-------|------|------|------|-------------------------------------------|
|                  | 1991         | 2001  | 2011  | 1991 | 2001 | 2011 |                                           |
| Andhra Pradesh   | 0.442        | 0.501 | 0.472 | 13   | 8    | 10   | 0.030                                     |
| Assam            | 0.679        | 0.666 | 0.627 | 3    | 3    | 4    | -0.052                                    |
| Bihar            | 0.536        | 0.476 | 0.530 | 7    | 11   | 7    | -0.006                                    |
| Gujarat          | 0.409        | 0.387 | 0.382 | 14   | 14   | 15   | -0.028                                    |
| Haryana          | 0.293        | 0.315 | 0.326 | 17   | 17   | 16   | 0.033                                     |
| Himachal Pradesh | 0.704        | 0.737 | 0.700 | 2    | 2    | 2    | -0.005                                    |
| Jammu & Kashmir  | 0.795        | 0.786 | 0.801 | 1    | 1    | 1    | 0.006                                     |
| Karnataka        | 0.511        | 0.489 | 0.474 | 8    | 9    | 9    | -0.037                                    |
| Kerala           | 0.455        | 0.477 | 0.443 | 10   | 10   | 12   | -0.012                                    |
| Madhya Pradesh   | 0.598        | 0.594 | 0.611 | 5    | 6    | 5    | 0.012                                     |
| Maharashtra      | 0.445        | 0.503 | 0.487 | 12   | 7    | 8    | 0.042                                     |
| Orissa           | 0.633        | 0.616 | 0.633 | 4    | 4    | 3    | 0.000                                     |
| Punjab           | 0.305        | 0.321 | 0.292 | 16   | 16   | 17   | -0.012                                    |
| Rajasthan        | 0.447        | 0.361 | 0.394 | 11   | 15   | 14   | -0.052                                    |
| Tamil Nadu       | 0.347        | 0.442 | 0.404 | 15   | 13   | 13   | 0.057                                     |
| Uttar Pradesh    | 0.469        | 0.469 | 0.462 | 9    | 12   | 11   | -0.007                                    |
| West Bengal      | 0.598        | 0.599 | 0.605 | 6    | 5    | 6    | 0.007                                     |
