# Supplementary material for: Agricultural Sustainability and Its Trends in India: A Macro-Level Index-Based Empirical Evaluation
Source: MDPI journal article supplement (doi:10.3390/su14052540), 2022-02-22
Supplement: s1 [file s1]

**Table S3.** Trend in value of output and per capita foodgrain production, across states, 1991-2011

| States                       | Value of output in agriculture, 2011 (Rs/ha) | Per capita foodgrain production (2011) | Decadal growth rate in value of output in agriculture (%/year) |         | Decadal growth rate in per capita foodgrain production (%/year) |         |
|------------------------------|----------------------------------------------|----------------------------------------|----------------------------------------------------------------|---------|-----------------------------------------------------------------|---------|
|                              |                                              |                                        | 1991-2001                                                      | 2001-11 | 1991-2001                                                       | 2001-11 |
| Andhra Pradesh               | 44140                                        | 240                                    | 2.20                                                           | 3.06    | 0.83                                                            | 1.34    |
| Assam                        | 51215                                        | 156                                    | 2.15                                                           | 0.11    | 0.18                                                            | 0.00    |
| Bihar                        | 39373                                        | 81                                     | 6.43                                                           | 2.40    | -1.55                                                           | -4.47   |
| Gujarat                      | 38994                                        | 138                                    | -0.84                                                          | 8.36    | -8.40                                                           | 10.66   |
| Haryana                      | 61444                                        | 656                                    | 2.55                                                           | 2.47    | 0.77                                                            | 0.43    |
| Himachal Pradesh             | 105043                                       | 207                                    | 2.99                                                           | 6.45    | -4.11                                                           | 1.24    |
| Jammu & Kashmir              | 90350                                        | 121                                    | -3.65                                                          | 5.77    | -4.50                                                           | 1.00    |
| Karnataka                    | 39452                                        | 227                                    | 4.74                                                           | 2.11    | 3.44                                                            | 0.89    |
| Kerala                       | 61023                                        | 16                                     | 1.63                                                           | -0.43   | -4.67                                                           | -4.12   |
| Madhya Pradesh               | 25060                                        | 224                                    | 0.13                                                           | 6.54    | -5.49                                                           | 3.35    |
| Maharashtra                  | 37112                                        | 137                                    | 2.67                                                           | 6.13    | -4.30                                                           | 2.75    |
| Orissa                       | 41238                                        | 182                                    | 0.22                                                           | 5.89    | -5.78                                                           | 2.97    |
| Punjab                       | 71778                                        | 1004                                   | 1.70                                                           | 1.50    | 0.89                                                            | -0.34   |
| Rajasthan                    | 18613                                        | 275                                    | 0.24                                                           | 3.70    | -3.83                                                           | 4.45    |
| Tamil Nadu                   | 48141                                        | 105                                    | 4.19                                                           | 1.26    | 0.03                                                            | -2.68   |
| Uttar Pradesh                | 49787                                        | 234                                    | 1.98                                                           | 1.78    | -0.37                                                           | -0.84   |
| West Bengal                  | 86576                                        | 158                                    | 2.87                                                           | 2.82    | 0.25                                                            | -0.83   |
| Coefficient of variation (%) | 42                                           | 94                                     | 118                                                            | 70      | -144                                                            | 367     |

*Source: Value of output from CSO, and per capita foodgrain production from Agricultural Statistics at a Glance; and growth rates are estimates of authors.*
