# Supplementary material for: Agricultural Sustainability and Its Trends in India: A Macro-Level Index-Based Empirical Evaluation
Source: MDPI journal article supplement (doi:10.3390/su14052540), 2022-02-22
Supplement: s1 [file s1]

**Table S2.** Trend in net irrigated area and stage of groundwater development in India, across states, 1991-2011

| State            | Net irrigated area (%) |      |      | Stage of groundwater development (%) |      |      |
|------------------|------------------------|------|------|--------------------------------------|------|------|
|                  | 1991                   | 2001 | 2011 | 1991                                 | 2001 | 2011 |
| Andhra Pradesh   | 39                     | 41   | 46   | 24                                   | 45   | 45   |
| Assam            | 21                     | 5    | 6    | 9                                    | 22   | 14   |
| Bihar            | 43                     | 48   | 51   | 19                                   | 37   | 42   |
| Gujarat          | 26                     | 30   | 41   | 41                                   | 76   | 67   |
| Haryana          | 73                     | 84   | 87   | 84                                   | 109  | 133  |
| Himachal Pradesh | 17                     | 23   | 20   | 18                                   | 30   | 71   |
| Jammu & Kashmir  | 41                     | 42   | 44   | 1                                    | 14   | 21   |
| Karnataka        | 20                     | 25   | 33   | 31                                   | 70   | 64   |
| Kerala           | 15                     | 17   | 20   | 15                                   | 47   | 47   |
| Madhya Pradesh   | 22                     | 26   | 47   | 16                                   | 41   | 54   |
| Maharashtra      | 14                     | 18   | 19   | 30                                   | 48   | 53   |
| Orissa           | 31                     | 24   | 27   | 8                                    | 18   | 28   |
| Punjab           | 93                     | 95   | 98   | 84                                   | 145  | 172  |
| Rajasthan        | 24                     | 31   | 39   | 51                                   | 125  | 137  |
| Tamil Nadu       | 43                     | 54   | 60   | 60                                   | 85   | 77   |
| Uttar Pradesh    | 61                     | 72   | 82   | 38                                   | 70   | 73   |
| West Bengal      | 36                     | 55   | 62   | 24                                   | 42   | 40   |

*Data Source: Agricultural Statistics at a Glance and Central Groundwater Development Board*
