# Supplementary material for: Agricultural Sustainability and Its Trends in India: A Macro-Level Index-Based Empirical Evaluation
Source: MDPI journal article supplement (doi:10.3390/su14052540), 2022-02-22
Supplement: s1 [file s1]

**Table S9.** Agricultural sustainability index, 1991-2011

| State             | Index values |       |       | Rank |      |      | Difference in index values (2011-1991) |
|-------------------|--------------|-------|-------|------|------|------|----------------------------------------|
|                   | 1991         | 2001  | 2011  | 1991 | 2001 | 2011 |                                        |
| Andhra Pradesh    | 0.349        | 0.415 | 0.469 | 13   | 11   | 9    | 0.120                                  |
| Assam             | 0.494        | 0.494 | 0.519 | 1    | 4    | 4    | 0.025                                  |
| Bihar             | 0.334        | 0.326 | 0.380 | 15   | 17   | 17   | 0.046                                  |
| Gujarat           | 0.367        | 0.371 | 0.409 | 11   | 14   | 15   | 0.041                                  |
| Haryana           | 0.337        | 0.404 | 0.451 | 14   | 12   | 12   | 0.114                                  |
| Himachal Pradesh  | 0.480        | 0.570 | 0.624 | 3    | 1    | 1    | 0.144                                  |
| Jammu and Kashmir | 0.492        | 0.524 | 0.548 | 2    | 2    | 2    | 0.056                                  |
| Karnataka         | 0.387        | 0.421 | 0.467 | 8    | 10   | 10   | 0.080                                  |
| Kerala            | 0.463        | 0.514 | 0.535 | 4    | 3    | 3    | 0.072                                  |
| Madhya Pradesh    | 0.384        | 0.389 | 0.441 | 9    | 13   | 13   | 0.057                                  |
| Maharashtra       | 0.378        | 0.429 | 0.478 | 10   | 8    | 8    | 0.100                                  |
| Odisha            | 0.415        | 0.429 | 0.490 | 6    | 7    | 6    | 0.075                                  |
| Punjab            | 0.404        | 0.448 | 0.463 | 7    | 6    | 11   | 0.059                                  |
| Rajasthan         | 0.324        | 0.337 | 0.412 | 17   | 16   | 14   | 0.089                                  |
| Tamil Nadu        | 0.352        | 0.426 | 0.479 | 12   | 9    | 7    | 0.127                                  |
| Uttar Pradesh     | 0.329        | 0.369 | 0.382 | 16   | 15   | 16   | 0.053                                  |
| West Bengal       | 0.417        | 0.477 | 0.515 | 5    | 5    | 5    | 0.098                                  |
