# Supplementary material for: Agricultural Sustainability and Its Trends in India: A Macro-Level Index-Based Empirical Evaluation
Source: MDPI journal article supplement (doi:10.3390/su14052540), 2022-02-22
Supplement: s1 [file s1]

**Table S7.** Economic sustainability index, 1991-2011

| State            | Index values |       |       | Rank |      |      | Difference of index values (2011-1991) |
|------------------|--------------|-------|-------|------|------|------|----------------------------------------|
|                  | 1991         | 2001  | 2011  | 1991 | 2001 | 2011 |                                        |
| Andhra Pradesh   | 0.223        | 0.253 | 0.323 | 11   | 9    | 9    | 0.100                                  |
| Assam            | 0.414        | 0.316 | 0.384 | 2    | 3    | 4    | -0.031                                 |
| Bihar            | 0.168        | 0.174 | 0.164 | 17   | 17   | 17   | -0.004                                 |
| Gujarat          | 0.211        | 0.211 | 0.333 | 15   | 15   | 7    | 0.122                                  |
| Haryana          | 0.369        | 0.420 | 0.490 | 3    | 2    | 2    | 0.120                                  |
| Himachal Pradesh | 0.259        | 0.315 | 0.424 | 7    | 5    | 3    | 0.165                                  |
| Jammu & Kashmir  | 0.302        | 0.226 | 0.277 | 4    | 13   | 14   | -0.025                                 |
| Karnataka        | 0.205        | 0.251 | 0.316 | 16   | 10   | 10   | 0.111                                  |
| Kerala           | 0.265        | 0.316 | 0.373 | 6    | 4    | 5    | 0.108                                  |
| Madhya Pradesh   | 0.211        | 0.200 | 0.259 | 14   | 16   | 16   | 0.047                                  |
| Maharashtra      | 0.217        | 0.229 | 0.311 | 13   | 12   | 11   | 0.093                                  |
| Orissa           | 0.269        | 0.237 | 0.283 | 5    | 11   | 13   | 0.014                                  |
| Punjab           | 0.479        | 0.527 | 0.538 | 1    | 1    | 1    | 0.059                                  |
| Rajasthan        | 0.219        | 0.217 | 0.265 | 12   | 14   | 15   | 0.046                                  |
| Tamil Nadu       | 0.230        | 0.273 | 0.323 | 9    | 8    | 8    | 0.093                                  |
| Uttar Pradesh    | 0.256        | 0.284 | 0.300 | 8    | 6    | 12   | 0.044                                  |
| West Bengal      | 0.226        | 0.279 | 0.343 | 10   | 7    | 6    | 0.118                                  |
